# Supplementary material
Source: PubMed Central journal article supplement (PMC5971537)

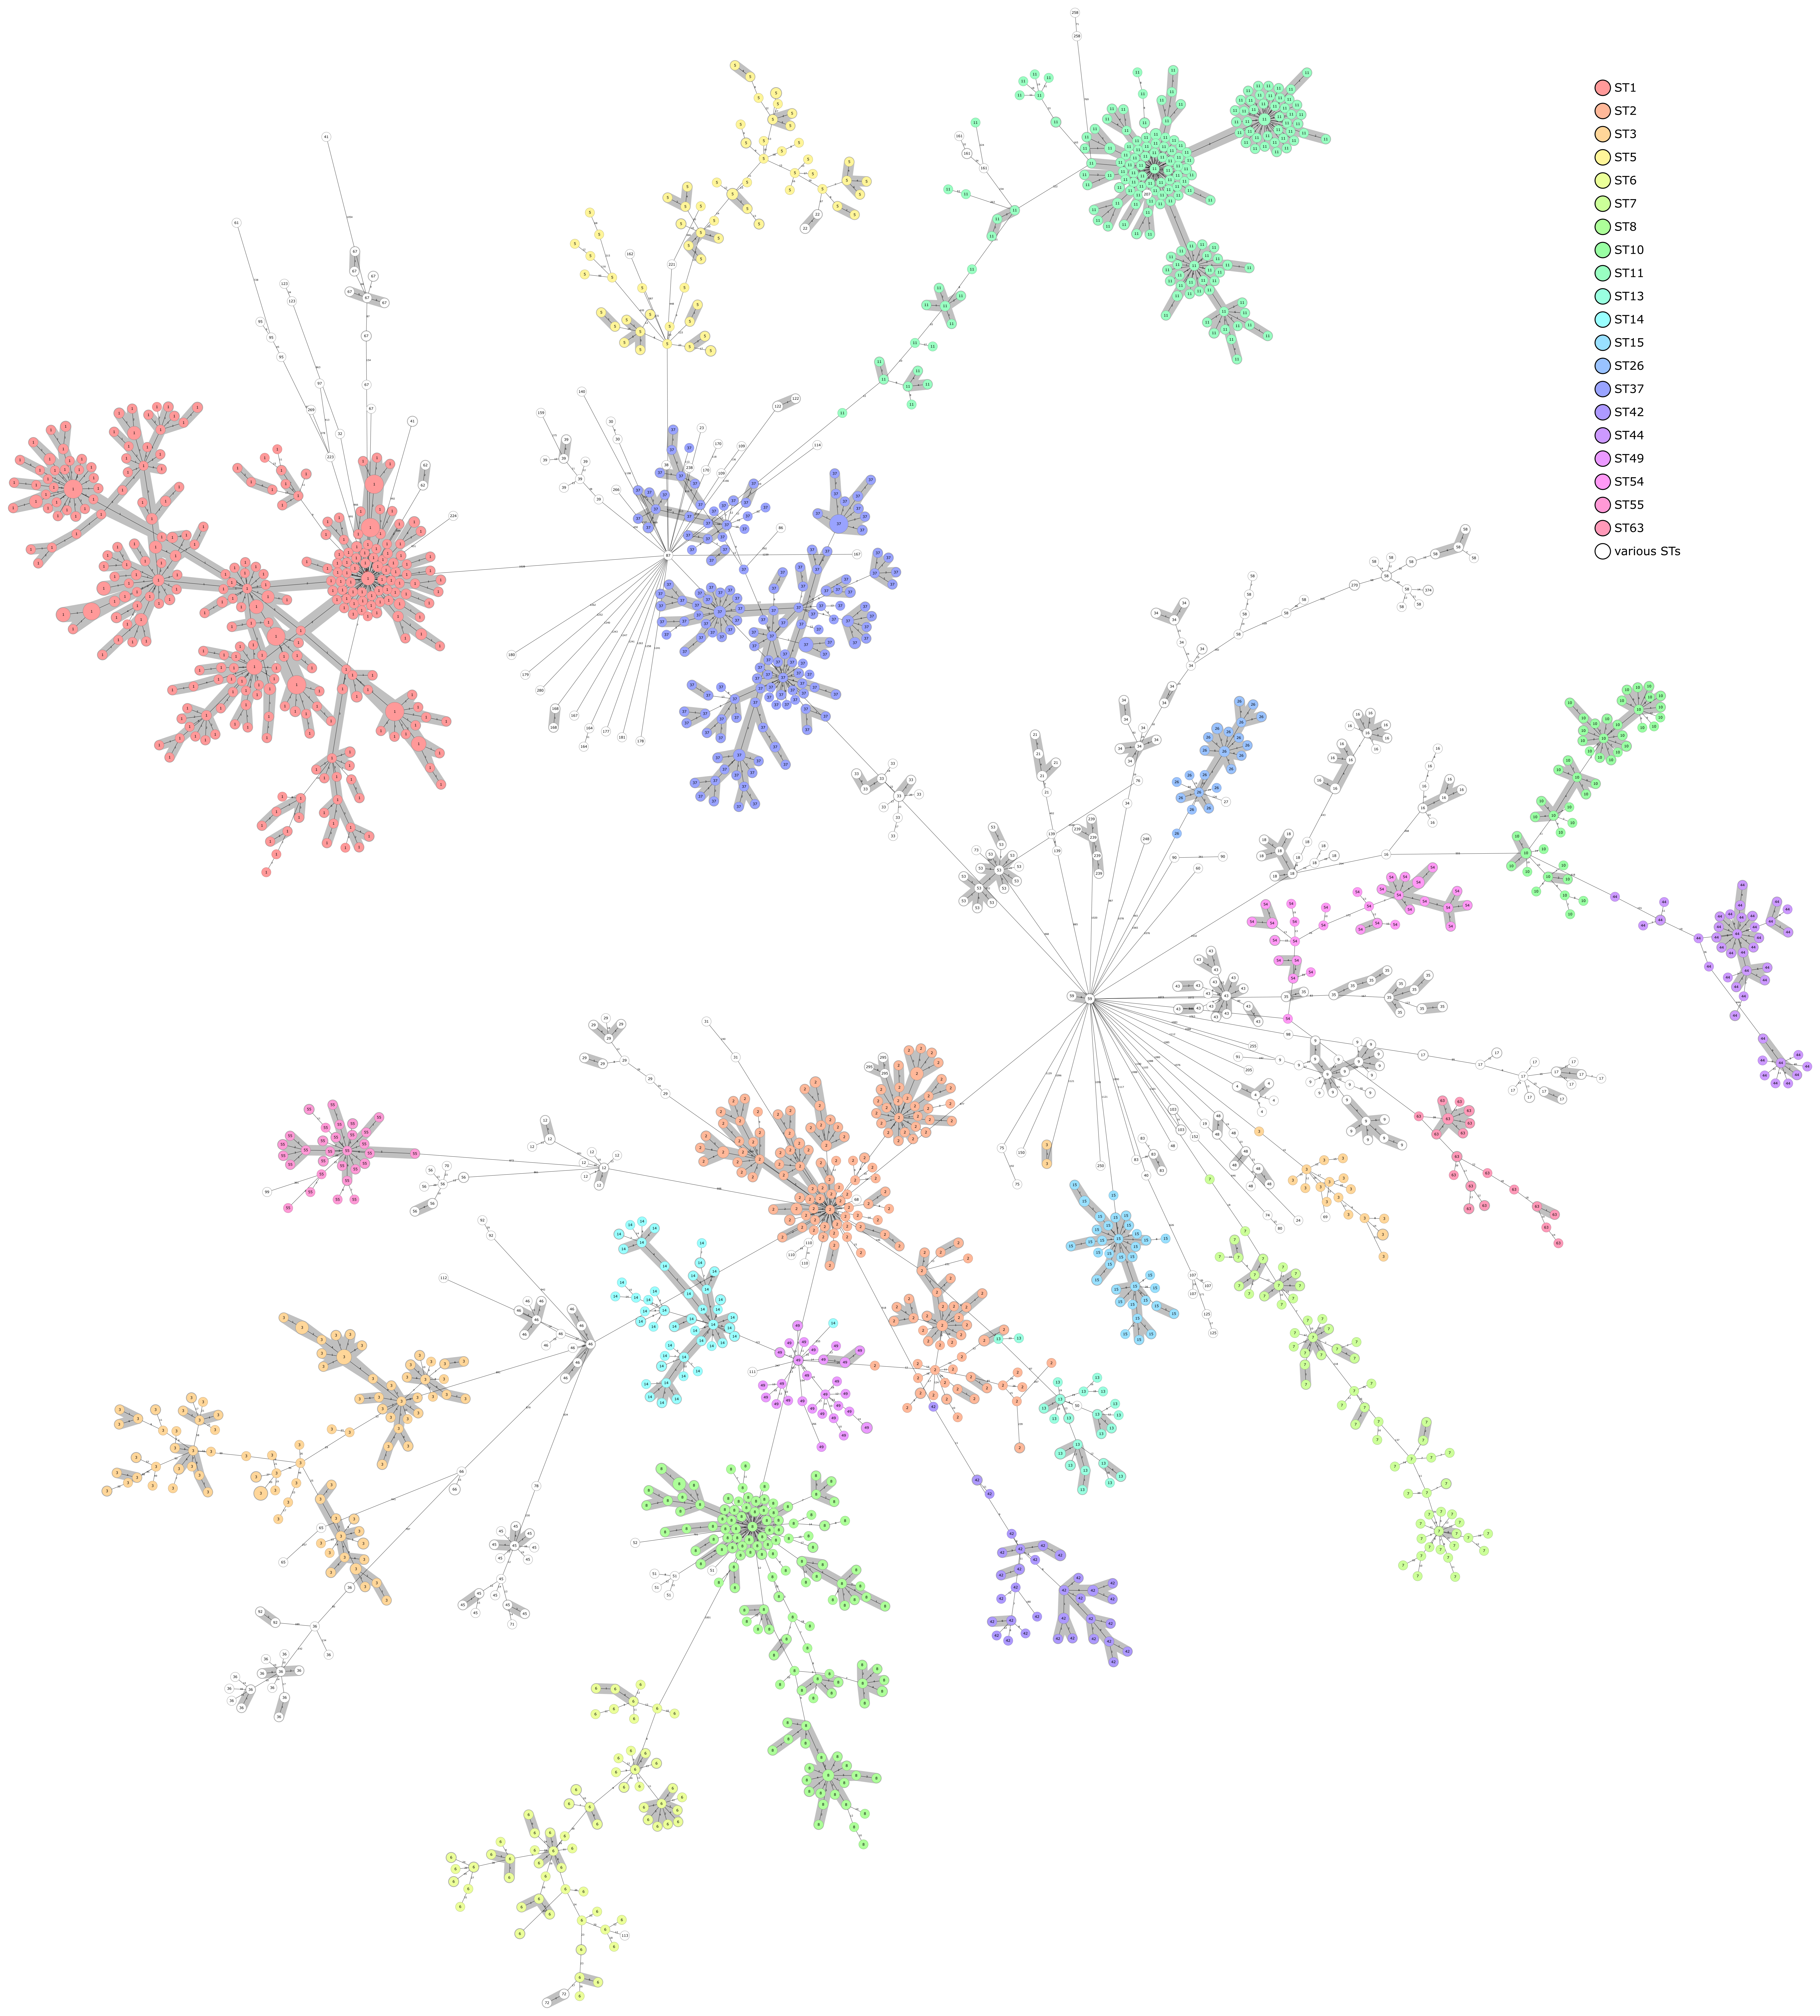

- ST1
- ST2
- ST3
- ST5
- ST6
- ST7
- ST8
- ST10
- ST11
- ST13
- ST14
- ST15
- ST26
- ST37
- ST42
- ST44
- ST49
- ST54
- ST55
- ST63
- various STs

Supplement: JCM.01987-17_zjm999095969s6.pdf [file JCM.01987-17_zjm999095969s6.pdf]
